# Supplementary material for: Exploration of structural influences on the ferroelectric switching characteristics of ferroelectric thin-film transistors
Source: Royal Society of Chemistry journal article supplement (doi:10.1039/d4nr02096k), 2024-01-01
Supplement: d4nr02096k1.pdf [file d4nr02096k1.pdf]

## Supplementary Information

Fig. S1 (a) The pulse schematic for measuring the retention property. Sequential initial and set pulses were applied followed by a read pulse with  $t_{\text{retention}}$ . (b)  $I_{\text{sw}}-V_{\text{BE}}$  and (c)  $R-V_{\text{BE}}$  plots after  $t_{\text{retention}} = 10, 100, \text{ and } 1000 \text{ s}$ , which measured from  $C_{11}$  (MFSM).
